# Supplementary material for: Soluble MD-2 and Heme in Sickle Cell Disease Plasma Promote Pro-Inflammatory Signaling in Endothelial Cells
Source: Frontiers journal article supplement (doi:10.3389/fimmu.2021.632709), 2021-03-26
Supplement: Data_Sheet_1.pdf [file Data_Sheet_1.pdf]

## Supplementary Material

Table 1: Characteristics of Controls and Sickle Cell Subjects

| <b>Controls</b>                         | <b>N=13</b>           |
|-----------------------------------------|-----------------------|
| Age                                     | NA                    |
| Gender                                  |                       |
| Male                                    | 3                     |
| Female                                  | 10                    |
| Ethnicity                               |                       |
| Caucasian                               | 9                     |
| Non-Caucasian                           | 4                     |
| <b>Sickle Cell</b>                      | <b>N=19</b>           |
| Age                                     | 33.7<br>(range 21-50) |
| Gender                                  |                       |
| Male                                    | 9                     |
| Female                                  | 10                    |
| Genotype                                |                       |
| Hemoglobin S-S                          | 12                    |
| Hemoglobin S-beta-thal                  | 2                     |
| Hemoglobin S-C                          | 5                     |
| CBC parameters†                         |                       |
| White blood cells (10 <sup>7</sup> /dL) | 10.6 ± 0.8            |
| Hemoglobin (g/dL)                       | 8.8 ± 0.5             |
| Hematocrit (%)                          | 25 ± 1.5              |
| Reticulocyte (absolute)                 | 238 ± 38              |

†values mean ± standard error of means

**Supplementary Table 1. Characteristics of controls and sickle cell disease subjects used in this study.**

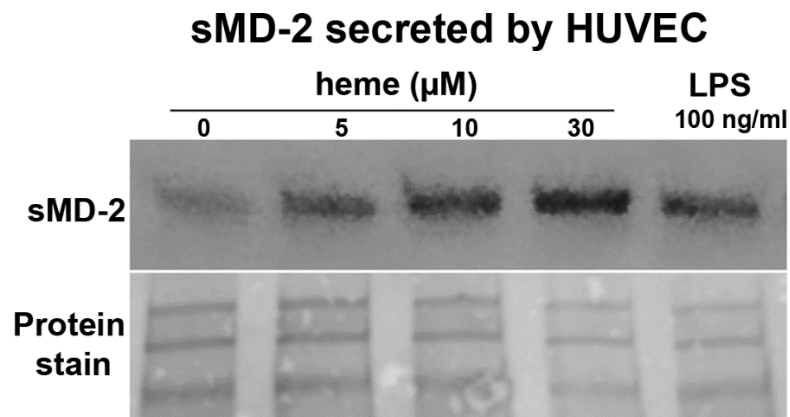

**Supplementary Figure 1. Heme induces the secretion of sMD-2 by HUVEC.** Heme (0-30  $\mu$ M) was added to HUVEC cell culture medium (RPMI-1640 with 0.2% FBS) for 18 hours. The sMD-2 level in the medium was determined by Western blot. The loading controls are shown as total protein stain. LPS (100 ng/ml) was added to HUVEC culture medium as a positive control.

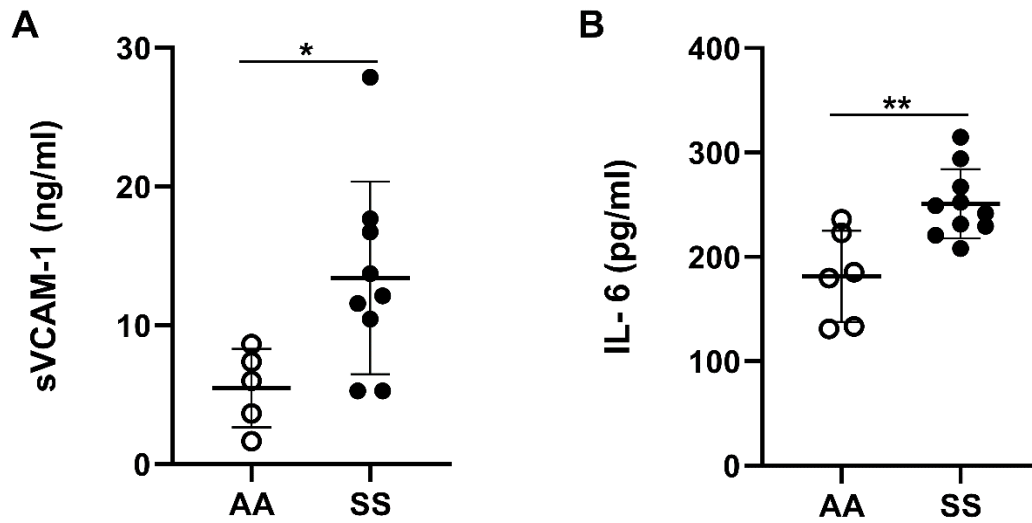

**Supplementary Figure 2. Human SS plasma induces sVCAM-1 and IL-6 secretion in HUVEC.** HUVEC were cultured with 2% AA or SS plasma in RPMI-1640 media for 18 hours. The sVCAM-1 (A) or IL-6 (B) content in the conditioned medium was measured by ELISA. Lines are means  $\pm$  SD, \* $p$ <0.05, \*\* $p$ <0.005.

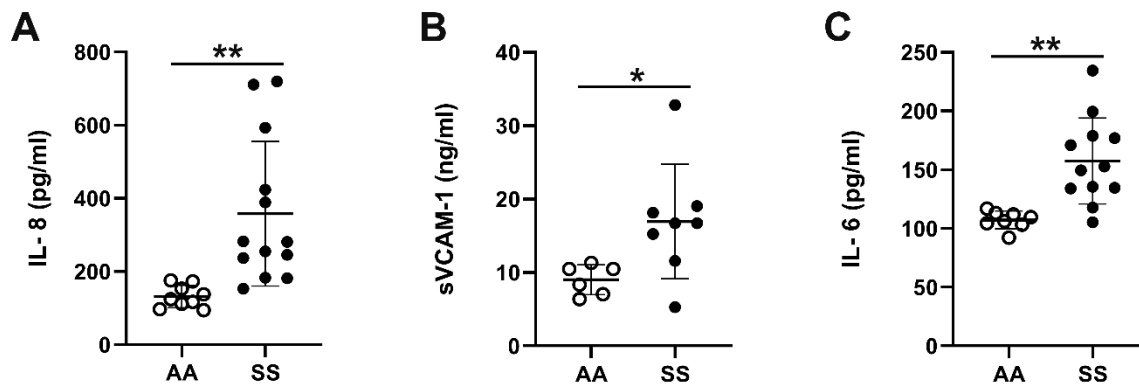

**Supplementary Figure 3. Human SS plasma induces IL-8, sVCAM-1 and IL-6 secretion in HMVEC-L.** Human lung microvascular endothelial cells (HMVEC-L) were cultured with 2% AA or SS plasma in RPMI-1640 media for 18 hours. The IL-8, sVCAM-1 and IL-6 content in the conditioned medium were measured by ELISA. (A) IL-8 was increased in SS plasma treated PMVEC-L ( $358.04 \pm 197.71$  pg/ml,  $n=13$ ), compared to AA plasma treated HMVEC-L ( $131.57 \pm 3.049$  pg/ml,  $n=9$ ). (B) sVCAM-1 was increased in SS plasma treated HMVEC-L ( $16.95 \pm 7.80$  ng/ml,  $n=8$ ) compared to AA plasma treated HMVEC-L ( $9.01 \pm 2.04$  ng/ml,  $n=6$ ). (C) IL-6 was increased in SS plasma treated HMVEC-L ( $159.49 \pm 37.56$  pg/ml,  $n=12$ ) compared to AA plasma treated HMVEC-L ( $107.86 \pm 8.07$  pg/ml,  $n=8$ ). \* $p<0.05$ , \*\* $p<0.005$ .

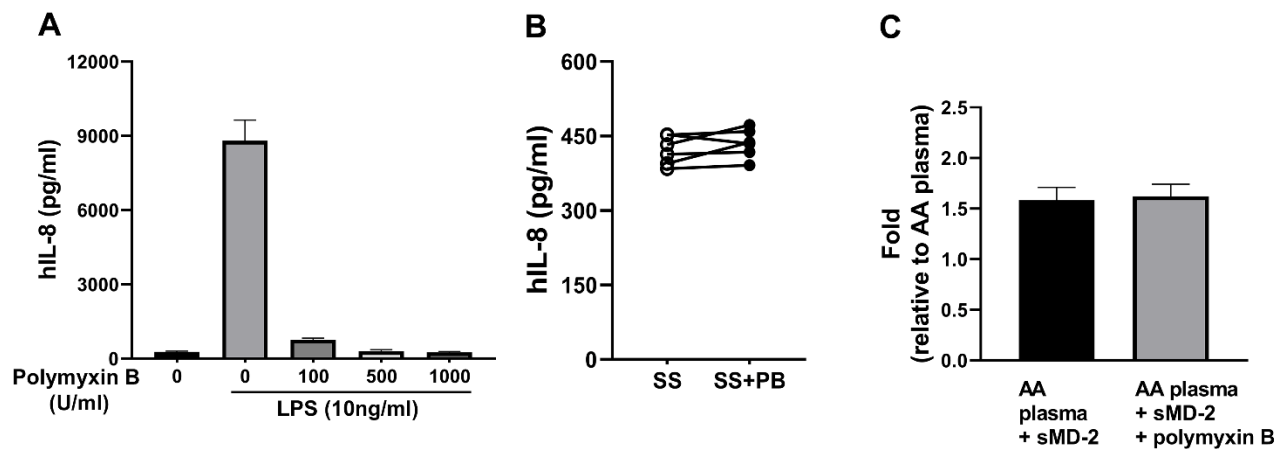

**Supplementary Figure 4. LPS inhibitor Polymyxin B (PB) has no effects on SS plasma and sMD-2 induced IL-8 secretion in HUVEC.** (A) HUVEC pretreated with various concentration of polymyxin B were stimulated with 10 ng/ml of LPS for 18 hours. (B) HUVEC were cultured with 2% SS plasma (n=6) or 2% SS plasma + polymyxin B (1000 U/ml) for 18 hours. (C) sMD-2 CHO-conditioned medium (10%) or control CHO medium plus 2% AA (n=4) plasma was added to HUVEC culture medium in the presence or absence of polymyxin B (1000 U/ml) for 18 hours culture. The secreted IL-8 content in the culture medium was measured by IL-8 ELISA.
